# Supplementary material for: Co-delivery of paclitaxel and curcumin to foliate positive cancer cells using Pluronic-coated iron oxide nanoparticles
Source: PubMed Central journal article supplement (PMC6825627; doi:10.1007/s40204-019-0118-5), 2019-06-13

## Standard Folic Acid Curve

| Concentration( $\mu\text{g/mL}$ ) | Abosorbance |
|-----------------------------------|-------------|
| 10                                | 0           |
| 20                                | 0.149       |
| 30                                | 0.305       |
| 40                                | 0.479       |
| 50                                | 0.636       |
| 60                                | 0.803       |
| 70                                | 0.96        |
| 80                                | 1.121       |
| 90                                | 1.264       |
| 100                               | 1.419       |

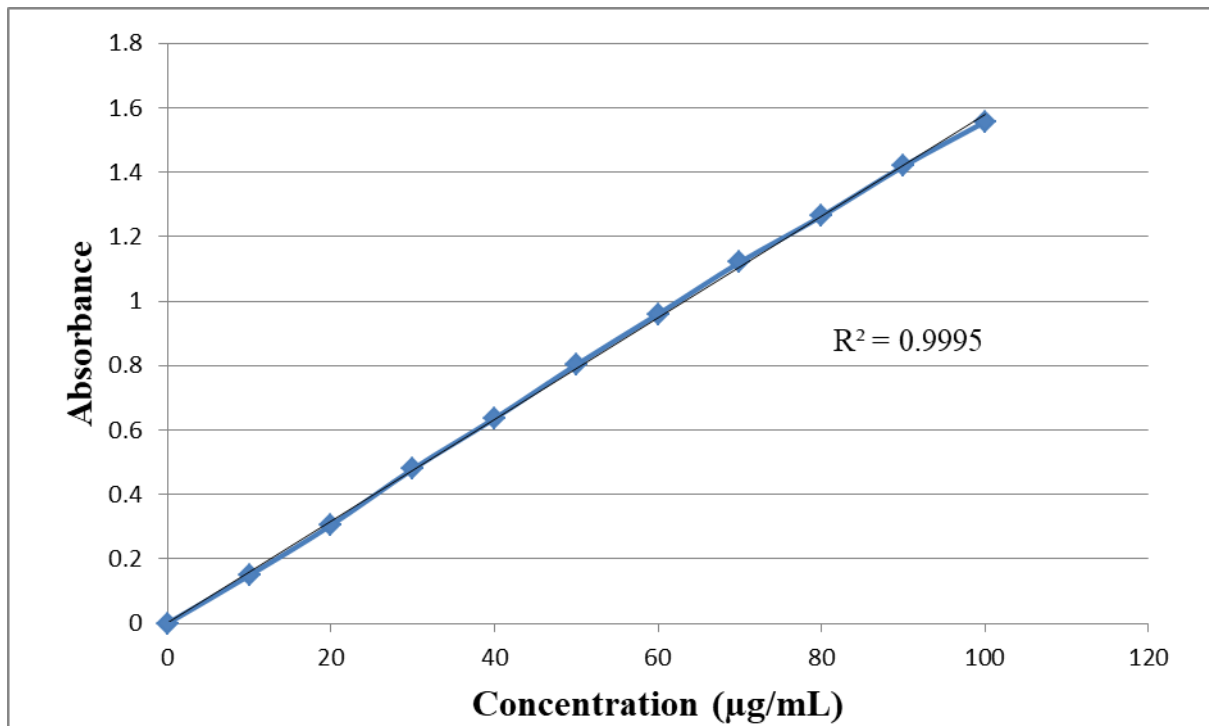

## Particle size, zeta potential and Polydispersity index of MNP and OAMNPPF127FA

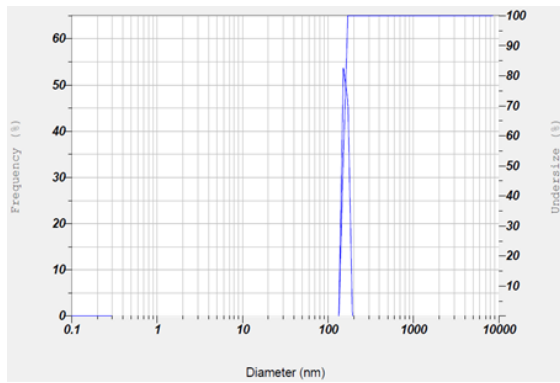

**MNP Size**

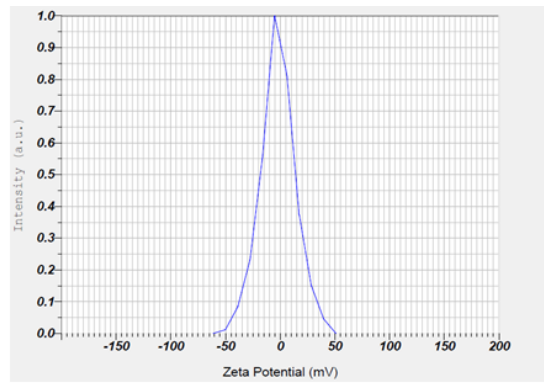

**MNP Zeta potential**

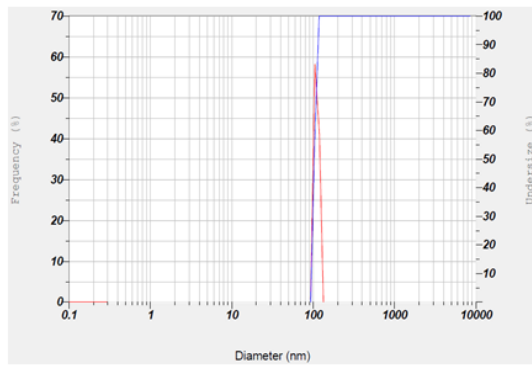

**OAMNPPF127FA Size**

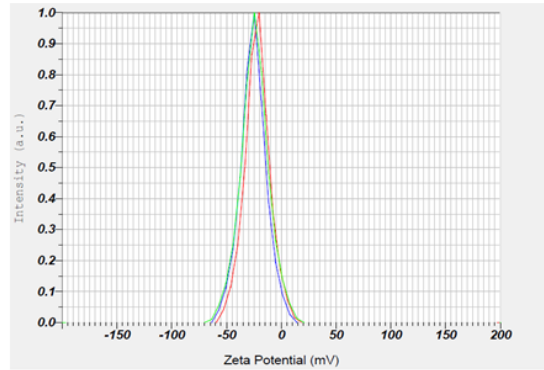

**OAMNPPF127FA Zeta potential**

## MTT assay

Microscopic images of MTT assay at 1 $\mu$ g/ml concentration at 48 hours incubation.

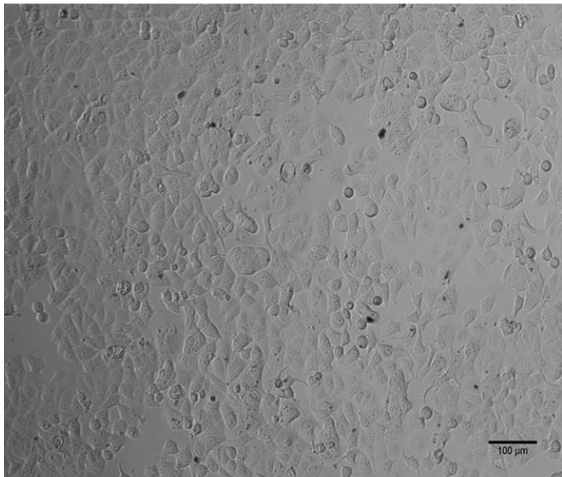

OAMNPPF127FA

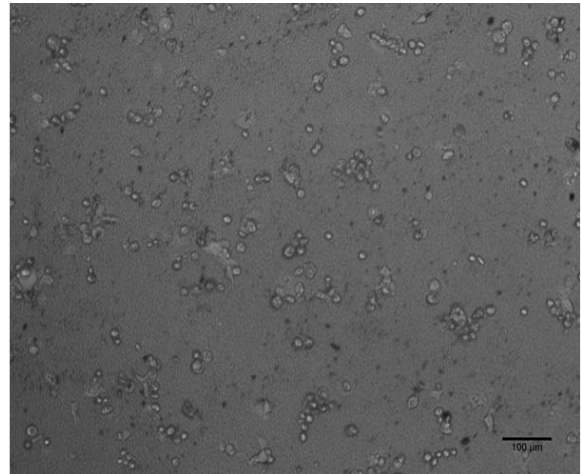

PTX-CUR-OAMNPPF127

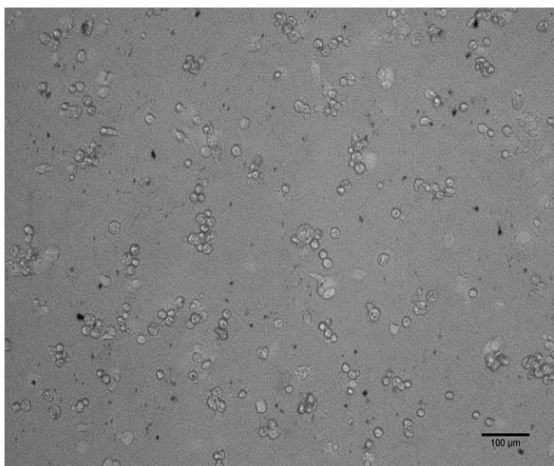

PTX-CUR-OAMNPPF127FA

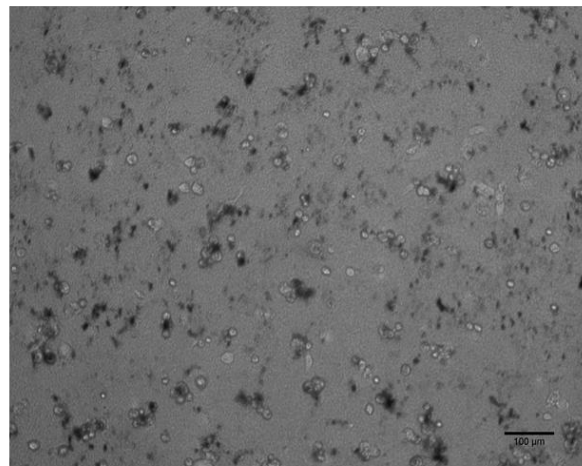

PTX-CUR-OAMNPPF127FA- Magnetic Field

## Cell Uptake

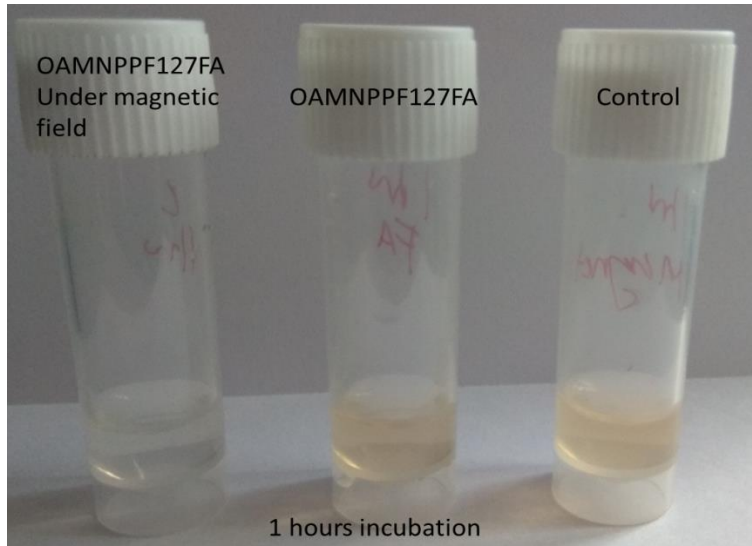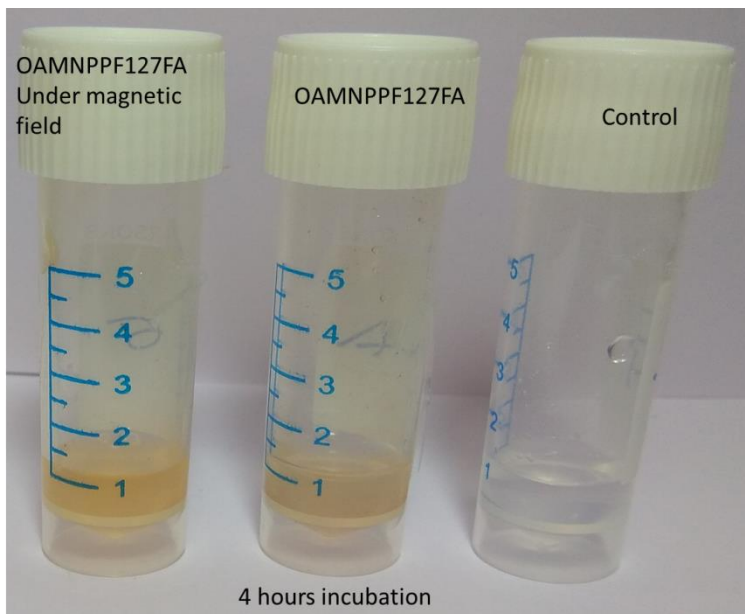

Supplement: 40204_2019_118_MOESM1_ESM.pdf [file 40204_2019_118_MOESM1_ESM.pdf]
